# Supplementary material for: Atomic-scale models of early-stage alkali depletion and SiO2-rich gel formation in bioactive glasses
Source: Royal Society of Chemistry journal article supplement (doi:10.1039/c4cp04711g), 2014-12-11
Supplement: c4cp04711g1.pdf [file c4cp04711g1.pdf]

### Electronic Supplementary Information

Atomic-scale models of early-stage alkali depletion and SiO<sub>2</sub>-rich gel formation in bioactive glasses

Antonio Tilocca\* (a.tilocca@ucl.ac.uk)

Department of Chemistry, University College London, London WC1H 0AJ, U.K.

**Table S1: Potential parameters**

Core-shell harmonic potential:  $V(r) = 0.5kr^2$

| interaction                                                          | $k$ (eV Å <sup>-2</sup> ) |
|----------------------------------------------------------------------|---------------------------|
| O <sub>C</sub> <sup>0.8482</sup> - O <sub>S</sub> <sup>-2.8482</sup> | 74.92                     |
| Oh <sub>C</sub> <sup>0.9</sup> - Oh <sub>S</sub> <sup>-2.3</sup>     | 74.92                     |

Buckingham potential:  $V(r) = Ae^{-r/\rho} - Cr^{-6}$

| interaction                      | $A$ (eV)   | $\rho$ (Å) | $C$ (eV Å <sup>6</sup> ) |
|----------------------------------|------------|------------|--------------------------|
| O <sub>S</sub> -O <sub>S</sub>   | 22764.3    | 0.149      | 27.88                    |
| Si-O <sub>S</sub>                | 1283.91    | 0.32052    | 10.66158                 |
| Si-Oh <sub>S</sub>               | 983.556    | 0.32052    | 10.66158                 |
| P-O <sub>S</sub>                 | 1120.0913  | 0.334772   | 0                        |
| P-Oh <sub>S</sub>                | 814.2      | 0.334772   | 0                        |
| Na-O <sub>S</sub>                | 56465.3453 | 0.193931   | 0                        |
| Na-Oh <sub>S</sub>               | 47095.911  | 0.193931   | 0                        |
| Ca-O <sub>S</sub>                | 2152.3566  | 0.309227   | 0.09944                  |
| Ca-Oh <sub>S</sub>               | 1222.715   | 0.309227   | 0.09944                  |
| Oh <sub>S</sub> -O <sub>S</sub>  | 22764.3    | 0.149      | 13.94                    |
| Oh <sub>S</sub> -Oh <sub>S</sub> | 22764.3    | 0.149      | 6.97                     |
| O <sub>S</sub> -H                | 311.97     | 0.25       | 0                        |
| Oh <sub>S</sub> -H               | 311.97     | 0.25       | 0                        |

Morse potential:  $V(r) = D[1 - \exp(-\beta(r-r_0))]^2$

| interaction       | $D$ (eV) | $\beta$ (Å <sup>-1</sup> ) | $r_0$ (Å) |
|-------------------|----------|----------------------------|-----------|
| O <sub>S</sub> -H | 7.0525   | 3.17490                    | 0.9485    |

Three-body potential:  $V^{\text{OTO}}(\theta_{ijk}) = 0.5k(\theta_{ijk} - \theta_0)^2 \exp[-(r_{ij}^8 + r_{ik}^8)/\rho^8]$

| interaction                                  | $k$ (eV rad <sup>-2</sup> ) | $\theta_0$ (deg) | $\rho$ (Å) |
|----------------------------------------------|-----------------------------|------------------|------------|
| O-Si-O (O=O <sub>S</sub> , Oh <sub>S</sub> ) | 6.150                       | 109.47           | 1.95       |
| O-P-O (O=O <sub>S</sub> , Oh <sub>S</sub> )  | 3.075                       | 109.47           | 1.95       |
